# Supplementary material
Source: PubMed Central journal article supplement (PMC6594698)
Supplement: NIHMS1529789-supplement-1.pdf [file NIHMS1529789-supplement-1.pdf]

## Supplementary Data

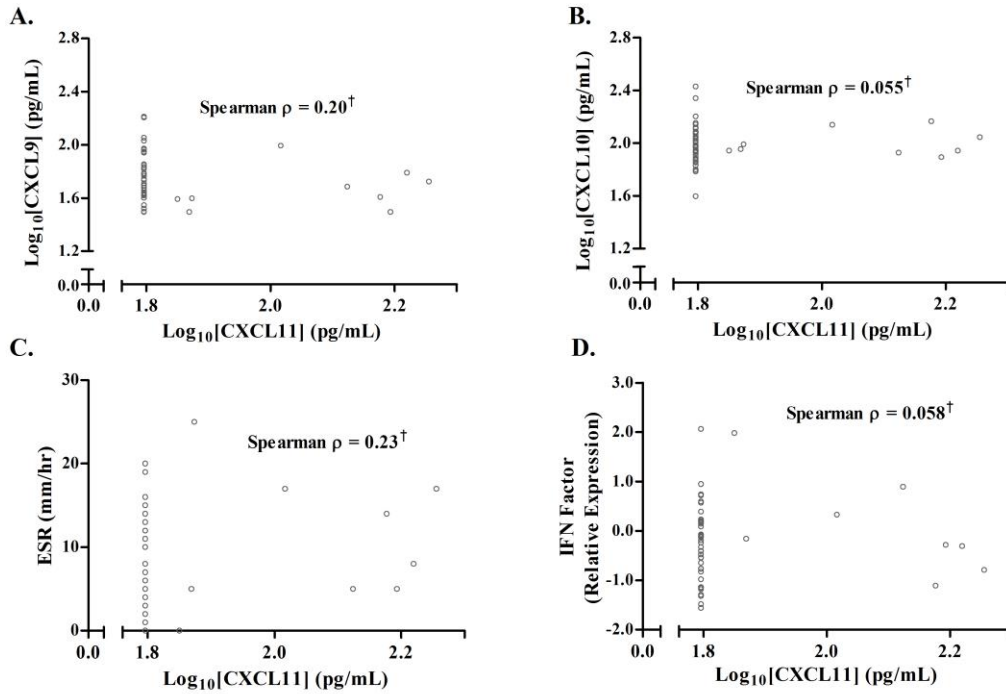

**Fig. S1.** Correlations of serum CXCL11 with blood measurements markers in healthy controls. In healthy control subjects, serum CXCL11 levels were not correlated with A) CXCL9 and B) CXCL10, C) ESR and D) a gene expression composite score reflecting IFN- $\gamma$ -related signaling (genes, *GBP1*, *STAT1*, and *STAT2*). Blood samples were processed and analyzed as described in Methods. Data are displayed as log<sub>10</sub> transformation of individual CXCL11 levels (represented by open gray circles) with Spearman correlations (<sup>†</sup>p > 0.05). Abbreviations: ESR = Erythrocyte Sedimentation Rate, IFN Factor = Interferon Factor, IFN- $\gamma$  = Interferon-gamma.

**Table S1**  
Gene Expression Correlations with CXCL11\*

| Gene                      | Spearman $\rho$ | p-Value |
|---------------------------|-----------------|---------|
| <i>GBP1</i> <sup>†</sup>  | 0.37            | <0.001  |
| <i>STAT1</i> <sup>†</sup> | 0.33            | 0.0011  |
| <i>STAT2</i> <sup>†</sup> | 0.34            | <0.001  |
| <i>TAP11</i>              | 0.39            | 0.0001  |
| <i>ICAM1</i>              | 0.37            | 0.0003  |
| <i>IRF9</i>               | 0.27            | 0.0087  |
| <i>IRF7</i>               | 0.22            | 0.036   |

\*Log<sub>10</sub>[CXCL11]

<sup>†</sup>Genes making up the “IFN Factor” (Interferon Factor)
